# Supplementary material for: GPS Data in Urban Online Car-Hailing: Simulation on Optimization and Prediction in Reducing Void Cruising Distance
Source: Hindawi journal article supplement (doi:10.1155/2020/6890601), 2020-11-24
Supplement: f1 [file 6890601.f1.docx]

**Extended Table 1.** Simulation result on holidays

| Date  Attribute | 12th | 13th | 19th | 20th | 26th | 27th |
| --- | --- | --- | --- | --- | --- | --- |
| Weather | Cloudy | Sunny | Partly cloudy | Sunny | Sunny | Cloudy |
| AWT | 221.67 s | 220.42 s | 217.64 s | 219.10 s | 220.10 | 225.24 |
| AVCDP | 2.68% | 2.57% | 2.54% | 2.53% | 2.67% | 2.77% |
| PCO | 0.00% | 0.00% | 0.00% | 0.00% | 0.00% | 0.00% |

AWT: Average waiting time of passenger

AVCDP: Average void cruising distance proportion

PCO: Proportion of cancelled orders

**Extended figure 1.** Temporal change of order number and average void cruising distance. (a) November 25th (b) November 27th

The figure shows that there is an inverse relationship between the number of orders and average void cruising distance.
